1 **Efficiency of genome-wide association study in open-pollinated populations**

2 José Marcelo Soriano Viana,<sup>\*1</sup> Gabriel Borges Mundim,<sup>\*</sup> Fabyano Fonseca e Silva,<sup>†</sup> and Antonio

3 Augusto Franco Garcia<sup>‡</sup>

4 <sup>\*</sup>Federal University of Viçosa, Department of General Biology, 36570-900, Viçosa, MG, Brazil.

5 <sup>†</sup>Federal University of Viçosa, Department of Animal Science, 36570-900, Viçosa, MG, Brazil.

6 <sup>‡</sup>ESALQ - University of São Paulo, Department of Genetics, 13418-900, Piracicaba, SP, Brazil.

7 Reference number for data available in public repository:

8 <https://dx.doi.org/10.6084/m9.figshare.3201838.v1>.

9 *REALbreeding* private link: <https://figshare.com/s/618bee7accd410464232>.

10

11 Running title: GWAS in open-pollinated populations.

12 **KEYWORDS** association mapping; GWAS; linkage disequilibrium; inbred lines panel; RIL.

13 <sup>1</sup>Corresponding author: José Marcelo Soriano Viana. Federal University of Viçosa, Department of  
14 General Biology, 36570-900, Viçosa, MG, Brazil. E-mail: [jmsviana@ufv.br](mailto:jmsviana@ufv.br). Telephone:  
15 +55(31)3899-2514.

16 **ABSTRACT** Genome-wide association studies (GWAS) with plant species have employed inbred  
17 lines panels. Thus, to our knowledge, no information is available on theory and efficiency of  
18 GWAS in open-pollinated populations. Our objectives are to present quantitative genetics theory for  
19 GWAS, evaluate the relative efficiency of GWAS in non-inbred and inbred populations and in an  
20 inbred lines panel, and assess factors affecting GWAS, such as linkage disequilibrium (LD), sample  
21 size, and quantitative trait locus (QTL) heritability. Fifty samples of 400 individuals from  
22 populations with LD were simulated. Individuals were genotyped for 10,000 single nucleotide  
23 polymorphisms (SNPs) and phenotyped for traits with different degrees of dominance controlled by  
24 10 QTLs and 90 minor genes. The average SNP density was 0.1 centiMorgan and the trait  
25 heritabilities were 0.4 and 0.8. We assessed GWAS efficiency based on the power of QTL  
26 detection, number of false-positive associations, bias in the estimated QTL position, and range of  
27 the significant SNPs for the same QTL. When the LD between a QTL and one or more SNPs is  
28 restricted to markers very close to or within the QTL, GWAS in open-pollinated populations can be  
29 highly efficient, depending mainly on QTL heritability and sample size. GWAS achieved the  
30 highest power of QTL detection, the smallest number of false-positive associations, and the lowest  
31 bias in the estimated QTL position for the inbred lines panel correcting for population structure.  
32 Under low QTL heritability and reduced sample size, GWAS is ineffective for non-inbred and  
33 inbred populations and for inbred lines panel.

34

## INTRODUCTION

35 Association mapping is a high-resolution method for mapping quantitative trait locus (QTL)  
36 based on linkage disequilibrium (LD) (Yu and Buckler 2006). Linkage disequilibrium is commonly  
37 defined as the non-random association of alleles at two loci carried on the same gamete, caused by  
38 their shared history of mutation and recombination (Weir 2008; Flint-Garcia *et al.* 2003).  
39 Association mapping has been successful in detecting genes controlling human diseases and  
40 quantitative traits in plant and animal species (Pearson and Manolio 2008; Zhu *et al.* 2008;  
41 Barendse *et al.* 2007). There are two main association mapping strategies: the candidate gene  
42 approach, which focuses on polymorphisms in specific genes that control the traits of interest, and  
43 the genome-wide association study (GWAS), which surveys the entire genome for polymorphisms  
44 associated with complex traits (Rafalski 2010).

45 With the advent of high-throughput genotyping and sequencing technologies, breeders have  
46 used GWAS to identify genes underlying quantitative trait variation. Compared to QTL mapping,  
47 which has statistical precision in the range of 10 to 30 centiMorgans (cM) (confidence interval or  
48 highest probability density interval), the main advantage of GWAS is a more precise identification  
49 of candidate genes (Zhu *et al.* 2008). Another advantage is the use of a breeding population instead  
50 of one derived by crossing two inbred or pure lines (Flint-Garcia *et al.* 2005). However, as  
51 highlighted by Weir (2010), the efficiency of GWAS is considerably affected by relatedness and  
52 population structure, which can generate spurious association between unlinked marker and QTL.  
53 Rafalski (2010) emphasized that the choices of population (due to the degree of LD and genotypic  
54 variation), marker density, and sample size are crucial decisions for achieving greater power of  
55 QTL detection. Ingvarsson and Street (2011) discussed the influence of population size, extent of  
56 LD, trait heritability (precision of phenotyping), and population structure on GWAS efficiency,  
57 highlighting that studies with plant species should greatly increase population size to detect QTLs  
58 with lower effect (heritability of 1–2%).

59 Yu *et al.* (2006) proposed a mixed model approach for GWAS analysis called the Q + K (or  
60 QK) method, where Q and K are the population structure and kinship matrices, respectively. This  
61 method has provided the best results and greatly has improved the control of both type I and type II  
62 error rates compared with other methods. Stich and Melchinger (2009) and Yang *et al.* (2010)  
63 compared GWAS methods based on simulated and field data. Based on type I error control and  
64 power of QTL detection, they concluded that the mixed model approach using only the kinship  
65 matrix (K model) to correct for relatedness was more efficient than the approaches controlling only  
66 population structure (Q model) and both population structure and relatedness because the spurious  
67 associations could not be completely controlled by population structure. Based on simulated inbred  
68 lines panel, Bernardo (2013) demonstrated that his models G and QG were superior to the K and  
69 QK, respectively, where G indicates a model that uses genome-wide markers to account for QTLs  
70 on background chromosomes. The new approach showed a better balance between power of QTL  
71 detection and false discovery rate (FDR).

72 Recently, many instances of GWAS have been published with plant species, including barley,  
73 sorghum, wheat, rice, sugarcane, soybean and particularly maize (Ingvarsson and Street 2011). Pace  
74 *et al.* (2015) carried out a GWAS with 384 maize inbred lines evaluated for 22 seedling root  
75 architecture traits and genotyped with 681,257 single nucleotide polymorphisms (SNPs). They  
76 identified 268 marker-trait associations. Some of these SNPs were located within or near (less than  
77 one kilo base pairs) to candidate genes involved in root development at the seedling stage.  
78 Thirunavukkarasu *et al.* (2014) evaluated 240 elite inbred lines of subtropical maize under water  
79 stress and used a set of 29,619 high-quality SNPs. The GWAS identified 50 SNPs consistently  
80 associated with agronomic traits related to functional traits that could lead to drought tolerance.  
81 Thirty-one of the SNPs detected were situated near drought-tolerance genes. Schaefer and Bernardo  
82 (2013) used GWAS on a collection of 284 historical maize inbred lines and 39,166 SNPs and  
83 identified 19 QTLs for flowering time, 13 for kernel composition, and 22 for disease resistance.

84 However, only two candidate genes were suggested: one regulating days to anthesis and one  
 85 regulating oil concentration. Additionally, several QTL hot spots (chromosome regions with  
 86 previously mapped QTLs) were also identified, affecting days to anthesis (four), days to silking  
 87 (two), and resistance to northern corn leaf blight (four) and Goss's wilt and blight (one).

88 Genome-wide association studies with plant species have employed inbred lines panels. Thus,  
 89 to our knowledge, no information is available on theory and efficiency of GWAS in open-pollinated  
 90 populations. Our objectives are to present quantitative genetics theory for GWAS, to evaluate the  
 91 relative efficiency of GWAS in non-inbred and inbred populations and in an inbred lines panel, and  
 92 to assess factors that affect GWAS, such as LD, sample size, and QTL heritability.

## 93 MATERIALS AND METHODS

### 94 Quantitative genetics theory for GWAS in open-pollinated populations

95 Consider a biallelic QTL (alleles **B/b**) and a SNP (alleles **C/c**) located in the same  
 96 chromosome, and a population (generation 0) of an open-pollinated species. Assuming LD, the joint  
 97 gamete and joint genotype probabilities in the population are presented by Viana et al. (2016). The  
 98 QTL genotypic values are  $G_{\mathbf{BB}} = m_b + a_b$ ,  $G_{\mathbf{Bb}} = m_b + d_b$ , and  $G_{\mathbf{bb}} = m_b - a_b$ , where  $m_b$  is  
 99 the mean of the genotypic values of the homozygotes,  $a_b$  is the deviation between the genotypic  
 100 value of the homozygote of higher expression and  $m_b$ , and  $d_b$  is the dominance deviation (the  
 101 deviation between the genotypic value of the heterozygote and  $m_b$ ). The average genotypic values  
 102 of individuals with the genotypes **CC**, **Cc**, and **cc** are

$$103 \quad G_{\mathbf{CC}} = \frac{1}{p_c} \left( f_{22} G_{\mathbf{BBCC}} + f_{12} G_{\mathbf{BbCC}} + f_{02} G_{\mathbf{bbCC}} \right)$$

$$= M + 2q_c \kappa_{bc} \alpha_b + \left( -2q_c^2 \kappa_{bc}^2 d_b \right) = M + 2\alpha_{\mathbf{C}} + D_{\mathbf{CC}} = M + A_{\mathbf{CC}} + D_{\mathbf{CC}} = m_c + a_c$$

$$104 \quad G_{\mathbf{Cc}} = \frac{1}{2p_c q_c} \left( f_{21} G_{\mathbf{BBCc}} + f_{11} G_{\mathbf{BbCc}} + f_{01} G_{\mathbf{bbCc}} \right)$$

$$= M + (q_c - p_c) \kappa_{bc} \alpha_b + 2p_c q_c \kappa_{bc}^2 d_b = M + (\alpha_{\mathbf{C}} + \alpha_{\mathbf{c}}) + D_{\mathbf{Cc}} = M + A_{\mathbf{Cc}} + D_{\mathbf{Cc}} = m_c + d_c$$

$$\begin{aligned}
 G_{\mathbf{CC}} &= \frac{1}{q_{\mathbf{C}}} \left( f_{20} G_{\mathbf{BBcc}} + f_{10} G_{\mathbf{Bbcc}} + f_{00} G_{\mathbf{bbcc}} \right) \\
 &= M + \left( -2p_{\mathbf{C}} \kappa_{\mathbf{bc}} \alpha_{\mathbf{b}} \right) + \left( -2p_{\mathbf{C}}^2 \kappa_{\mathbf{bc}}^2 d_{\mathbf{b}} \right) = M + 2\alpha_{\mathbf{C}} + D_{\mathbf{CC}} = M + A_{\mathbf{CC}} + D_{\mathbf{CC}} = m_{\mathbf{C}} - a_{\mathbf{C}}
 \end{aligned}$$

106 where  $p$  is the frequency of the major allele  
 107 ( $\mathbf{B}$  or  $\mathbf{C}$ ),  $q=1-p$  is the frequency of the minor allele ( $\mathbf{b}$  or  $\mathbf{c}$ ),  $f_{ij}$  is the probability of the  
 108 individual with  $i$  and  $j$  copies of the allele  $\mathbf{B}$  of the QTL and allele  $\mathbf{C}$  of the SNP ( $i, j = 2, 1, \text{ or } 0$ )  
 109 (for simplicity, we omitted the superscript (0) - for generation 0 - in all parameters that depend on  
 110 the LD measure of generation  $-1$ ),  $M = m_{\mathbf{b}} + (p_{\mathbf{b}} - q_{\mathbf{b}})a_{\mathbf{b}} + 2p_{\mathbf{b}}q_{\mathbf{b}}d_{\mathbf{b}}$  is the population mean,

$$\kappa_{\mathbf{bc}} = \left[ \frac{\Delta_{\mathbf{bc}}^{(-1)}}{p_{\mathbf{C}}q_{\mathbf{C}}} \right], \quad \alpha_{\mathbf{b}} = a_{\mathbf{b}} + (q_{\mathbf{b}} - p_{\mathbf{b}})d_{\mathbf{b}} \quad \text{is the average effect of a gene substitution,}$$

112  $\alpha_{\mathbf{C}} = q_{\mathbf{C}}\kappa_{\mathbf{bc}}\alpha_{\mathbf{b}}$  and  $\alpha_{\mathbf{c}} = -p_{\mathbf{C}}\kappa_{\mathbf{bc}}\alpha_{\mathbf{b}}$  are the average effects of the SNP alleles, and  $A$  and  $D$  are

113 the SNP additive and dominance values.  $\Delta_{\mathbf{bc}}^{(-1)} = P_{\mathbf{BC}}^{(-1)}P_{\mathbf{bc}}^{(-1)} - P_{\mathbf{Bc}}^{(-1)}P_{\mathbf{bC}}^{(-1)}$  is the measure of LD in

114 the gametic pool of generation  $-1$  (Kempthorne 1957), where  $P^{(-1)}$  indicates a joint gamete

115 probability. Another common measure of LD is the square of the correlation between the values of

116 the alleles at the two loci ( $r_{\mathbf{bc}}^{(-1)}$ ) in the gametic pool of generation  $-1$  (Hill and Robertson 1968).

117 Note that  $\Delta_{\mathbf{bc}}^{(-1)} = r_{\mathbf{bc}}^{(-1)} \sqrt{p_{\mathbf{b}}q_{\mathbf{b}}p_{\mathbf{C}}q_{\mathbf{C}}}$ . The average effect of substituting the allele  $\mathbf{C}$  for  $\mathbf{c}$  is

118  $\alpha_{\text{SNP}} = \alpha_{\mathbf{C}} - \alpha_{\mathbf{c}} = \kappa_{\mathbf{bc}}\alpha_{\mathbf{b}}$ . The dominance deviation for the SNP is  $d_{\text{SNP}} = \kappa_{\mathbf{bc}}^2 d_{\mathbf{b}}$ . The other

119 SNP parameters are  $m_{\mathbf{C}} = M + (q_{\mathbf{C}} - p_{\mathbf{C}})\alpha_{\text{SNP}} - (1 - 2p_{\mathbf{C}}q_{\mathbf{C}})d_{\text{SNP}}$ ,  $a_{\mathbf{C}} = \alpha_{\text{SNP}} - (q_{\mathbf{C}} - p_{\mathbf{C}})d_{\text{SNP}}$ ,

120 and  $d_{\mathbf{C}} = d_{\text{SNP}}$ .

121 Assuming no QTL in LD with the SNP,  $G_{\mathbf{CC}} = G_{\mathbf{Cc}} = G_{\mathbf{cc}} = M$ . Thus, the identification of

122 the QTL can be based on testing the hypothesis that there is no difference between these genotypic

123 means (based on analysis of variance). Assuming thousands of SNPs, it is necessary to employ a  
124 Bonferroni-type procedure to control the type I error when there are multiple-comparisons, as that  
125 proposed by Benjamini and Hochberg (1995). Note that  $\alpha_{\text{SNP}} = a_c + (q_c - p_c)d_{\text{SNP}}$ , where  
126  $a_c = G_{\text{CC}} - m_c$ ,  $d_{\text{SNP}} = G_{\text{Cc}} - m_c$ , and  $m_c = (G_{\text{CC}} + G_{\text{cc}})/2$ .

127 Alternatively, the QTL identification can be done by testing that there is no relationship  
128 between the genotypic values for the individuals **CC**, **Cc**, and **cc** with the number of copies of one  
129 SNP allele. The parameters of the additive-dominance model can be derived by fitting the model  
130  $G = \beta_0 + \beta_1x + \beta_2x^2 + \varepsilon$  ( $x = 2, 1, \text{ or } 0$ ), where  $G$  is the QTL genotypic value. The model can be  
131 expressed as  $y_{(9 \times 1)} = X_{(9 \times 3)}\beta_{(3 \times 1)} + \text{error vector}_{(9 \times 1)}$ , where  $y$  is the vector of QTL genotypic  
132 values, conditional on the SNP genotype,  $X$  is the incidence matrix, and  $\beta$  is the parameter vector.  
133 The matrix of genotype probabilities is  $P_{(9 \times 9)} = \text{diagonal}\{f_{ij}\}$ . Thus, for the complete model or a  
134 reduced model,  $\beta = (X'PX)^{-1}(X'Py)$ . The parameters for the complete model are

$$135 \quad \beta_0 = M - 2p_c\alpha_{\text{SNP}} - 2p_c^2d_{\text{SNP}}$$

$$136 \quad \beta_1 = \alpha_{\text{SNP}} + (1 + 2p_c)d_{\text{SNP}}$$

$$137 \quad \beta_2 = -d_{\text{SNP}}$$

138 The alternative regression model is  $G = \beta_0 + \beta_1x_1 + \beta_2x_2 + \varepsilon$ , where  $x_1 = 1, 0, \text{ or } -1$  if the  
139 individual is **CC**, **Cc**, or **cc**, and  $x_2 = 0$  or  $1$  if the individual is homozygous or heterozygous,  
140 respectively. Fitting the complete model,  $\beta_0 = m_c$ ,  $\beta_1 = a_c$ , and  $\beta_2 = d_{\text{SNP}}$ . Assuming no QTL in  
141 LD with the SNP,  $\beta_1 = \beta_2 = 0$  and  $\beta_0 = M$ , regardless of the model. Fitting the additive model,  
142  $G = \beta_0 + \beta_1x + \varepsilon$  or  $G = \beta_0 + \beta_1x_1 + \varepsilon$  (no dominance),  $\beta_1 = \alpha_{\text{SNP}}$ .

143 If there are two QTLs (alleles **B/b** and **E/e**) in LD with the SNP (alleles **C/c**), it can be  
144 demonstrated that (Viana *et al.* 2016)

145  $\alpha_{\text{SNP}} = \kappa_{\text{bc}}\alpha_{\text{b}} + \kappa_{\text{ce}}\alpha_{\text{e}}$

146  $d_{\text{SNP}} = \kappa_{\text{bc}}^2 d_{\text{b}} + \kappa_{\text{ce}}^2 d_{\text{e}}$

147 where  $\kappa_{\text{ce}} = \left[ \frac{\Delta_{\text{ce}}^{(-1)}}{p_{\text{c}}q_{\text{c}}} \right]$ . Thus, the average effect of a SNP substitution (and the SNP additive value)

148 is proportional to the measure of LD and to the average effect of a gene substitution for each QTL  
 149 that is in LD with the marker, and the SNP dominance deviation (and the SNP dominance value) is  
 150 proportional to the square of the LD value and to the dominance deviation for each QTL that is in  
 151 LD with the marker.

152 If there is population structure, this must be corrected in the GWAS to avoid spurious  
 153 associations due to admixture LD. For simplicity, consider two subpopulations in Hardy-Weinberg  
 154 equilibrium and a SNP (alleles **C/c**) and a QTL (alleles **B/b**) unlinked, in linkage equilibrium in  
 155 both subpopulations. Assuming that  $p$  and  $q$  are the allelic frequencies in one subpopulation and  $r$   
 156 and  $s$  are the allelic frequencies in the other subpopulation, the average genotypic value of  
 157 individuals **CC**, **Cc**, and **cc** are

158 
$$G_{\text{CC}} = m_{\text{b}} + \left( \frac{1}{u_1 p_{\text{c}}^2 + u_2 r_{\text{c}}^2} \right) \left\{ \left[ u_1 (p_{\text{b}} - q_{\text{b}}) p_{\text{c}}^2 + u_2 (r_{\text{b}} - s_{\text{b}}) r_{\text{c}}^2 \right] a_{\text{b}} \right.$$

$$\left. + \left( u_1 2p_{\text{b}}q_{\text{b}}p_{\text{c}}^2 + u_2 2r_{\text{b}}s_{\text{b}}r_{\text{c}}^2 \right) d_{\text{b}} \right\}$$

159 
$$G_{\text{Cc}} = m_{\text{b}} + \left( \frac{1}{u_1 2p_{\text{c}}q_{\text{c}} + u_2 2r_{\text{c}}s_{\text{c}}} \right) \left\{ \left[ u_1 (p_{\text{b}} - q_{\text{b}}) 2p_{\text{c}}q_{\text{c}} + u_2 (r_{\text{b}} - s_{\text{b}}) 2r_{\text{c}}s_{\text{c}} \right] a_{\text{b}} \right.$$

$$\left. + \left( u_1 2p_{\text{b}}q_{\text{b}} 2p_{\text{c}}q_{\text{c}} + u_2 2r_{\text{b}}s_{\text{b}} 2r_{\text{c}}s_{\text{c}} \right) d_{\text{b}} \right\}$$

160 
$$G_{\text{cc}} = m_{\text{b}} + \left( \frac{1}{u_1 q_{\text{c}}^2 + u_2 s_{\text{c}}^2} \right) \left\{ \left[ u_1 (p_{\text{b}} - q_{\text{b}}) q_{\text{c}}^2 + u_2 (r_{\text{b}} - s_{\text{b}}) s_{\text{c}}^2 \right] a_{\text{b}} \right.$$

$$\left. + \left( u_1 2p_{\text{b}}q_{\text{b}}q_{\text{c}}^2 + u_2 2r_{\text{b}}s_{\text{b}}s_{\text{c}}^2 \right) d_{\text{b}} \right\}$$



161 where  $u_1$  and  $u_2$  are the proportions of individuals from subpopulations 1 and 2 (probabilities of  
 162 an individual belongs to subpopulations 1 and 2). Only if there is no population structure ( $u_1 = 1$  or  
 163 0),  $G_{CC} = G_{Cc} = G_{cc} = M$  (and  $\beta_1 = \beta_2 = 0$  and  $\beta_0 = M$ ).

#### 164 **Quantitative genetics theory for GWAS with inbred lines panel**

165 In general, the inbred lines in a panel represent the genetic variability for the traits being  
 166 assessed. Therefore, an inbred lines panel includes inbreds from distinct populations or heterotic  
 167 groups. Consider again a QTL (alleles **B/b**) and a SNP (alleles **C/c**) located in the same  
 168 chromosome, and that they are in LD in a population (generation 0). Assuming  $n$  ( $n \rightarrow \infty$ )  
 169 generations of selfing, the (limits of the) probabilities of the inbreds (recombinant inbred lines;  
 170 RILs) are (for simplicity, we omitted again the superscript (0) - for generation 0 - in all parameters  
 171 that depend on the LD measure of generation  $-1$ )

$$172 \quad f_{22}^{(n)} = f_{22} + \frac{1}{2}(f_{21} + f_{12}) + \frac{1}{4}f_{11} + \frac{1}{2}\left(\frac{1 - 2\theta_{bc}}{1 + 2\theta_{bc}}\right)\Delta_{bc}^{(-1)}$$

$$173 \quad f_{20}^{(n)} = f_{20} + \frac{1}{2}(f_{21} + f_{10}) + \frac{1}{4}f_{11} - \frac{1}{2}\left(\frac{1 - 2\theta_{bc}}{1 + 2\theta_{bc}}\right)\Delta_{bc}^{(-1)}$$

$$174 \quad f_{02}^{(n)} = f_{02} + \frac{1}{2}(f_{01} + f_{12}) + \frac{1}{4}f_{11} - \frac{1}{2}\left(\frac{1 - 2\theta_{bc}}{1 + 2\theta_{bc}}\right)\Delta_{bc}^{(-1)}$$

$$175 \quad f_{00}^{(n)} = f_{00} + \frac{1}{2}(f_{01} + f_{10}) + \frac{1}{4}f_{11} + \frac{1}{2}\left(\frac{1 - 2\theta_{bc}}{1 + 2\theta_{bc}}\right)\Delta_{bc}^{(-1)}$$

176 where  $\theta_{bc}$  is the frequency of recombinant gametes. The haplotypes are  $P_{\mathbf{BC}}^{(n)} = p_b p_c + \Delta_{bc}^{(n)}$ ,

177  $P_{\mathbf{Bc}}^{(n)} = p_b q_c - \Delta_{bc}^{(n)}$ ,  $P_{\mathbf{bC}}^{(n)} = q_b p_c - \Delta_{bc}^{(n)}$ , and  $P_{\mathbf{bc}}^{(n)} = q_b q_c + \Delta_{bc}^{(n)}$ , where

178  $\Delta_{bc}^{(n)} = \left(\frac{1}{1 + 2\theta_{bc}}\right)\Delta_{bc}^{(-1)}$ . Thus, if there is crossing over ( $0 < \theta_{bc} \leq 0.5$ ), the LD in this inbred

179 population is lower than the LD in generation  $-1$ . If the SNP and QTL are completely linked ( $\theta_{bc}$   
 180  $= 0$ ), the LD in the inbred population is the same LD in generation  $-1$ . The maximum decrease is  
 181 50%, achieved with  $\theta_{bc} = 0.5$ . Compared with the LD in generation 0, the LD in generation  $n$  is

182 
$$\Delta_{bc}^{(n)} = \left[ \frac{1}{(1+2\theta_{bc})(1-\theta_{bc})} \right] \Delta_{bc}^{(0)}$$
. Thus, the maximum decrease is 12%, achieved with  $\theta_{bc} = 0.25$ .

183 In contrast, after  $n$  generations of random crosses  $\Delta_{bc}^{(n)} = (1-\theta_{bc})^{n+1} \Delta_{bc}^{(-1)} = (1-\theta_{bc})^n \Delta_{bc}^{(0)}$ .

184 Thus, if  $0 < \theta_{bc} \leq 0.5$ , the maximum decrease is 100% since  $\lim_{n \rightarrow \infty} \Delta_{bc}^{(n)} = 0$ .

185 For the inbreds sampled from a population, we have

186 
$$G_{CC}^{(n)} = \frac{1}{f_{.2}^{(n)}} \left[ f_{22}^{(n)}(m_b + a_b) + f_{02}^{(n)}(m_b - a_b) \right] = M_{IL} + 2q_c \alpha_{SNP}^{(n)} = M_{IL} + A_{CC}^{(n)}$$

187 
$$G_{cc}^{(n)} = \frac{1}{f_{.0}^{(n)}} \left[ f_{20}^{(n)}(m_b + a_b) + f_{00}^{(n)}(m_b - a_b) \right] = M_{IL} - 2p_c \alpha_{SNP}^{(n)} = M_{IL} + A_{cc}^{(n)}$$

188 where  $M_{IL} = m_b + (p_b - q_b)a_b$  is the inbred population mean,  $\alpha_{SNP}^{(n)} = \left( \frac{1}{2+4\theta_{bc}} \right) \kappa_{bc} a_b$  is the

189 SNP average effect of allele substitution in the inbred population, and  $A$  is the SNP additive value

190 for an inbred line. Assuming no QTL in LD with the SNP,  $G_{CC}^{(n)} = G_{cc}^{(n)} = M_{IL}$ . Note that

191 
$$\alpha_{SNP}^{(n)} = \left( G_{CC}^{(n)} - G_{cc}^{(n)} \right) / 2$$
.

192 The haplotypes of an inbred lines panel including inbreds from  $N$  populations are

193 
$$P_{BC}^{(n)'} = \bar{p}_b \bar{p}_c + \Delta_{bc}^{(n)'}$$
, 
$$P_{Bc}^{(n)'} = \bar{p}_b \bar{q}_c - \Delta_{bc}^{(n)'}$$
, 
$$P_{bC}^{(n)'} = \bar{q}_b \bar{p}_c - \Delta_{bc}^{(n)'}$$
, and 
$$P_{bc}^{(n)'} = \bar{q}_b \bar{q}_c + \Delta_{bc}^{(n)'}$$
,

194 where  $\Delta_{bc}^{(n)'} = \sum_{i=1}^N u_i \left[ \Delta_{bc_i}^{(n)} + p_{b_i} p_{c_i} \right] - \left( \sum_{i=1}^N u_i p_{b_i} \right) \left( \sum_{i=1}^N u_i p_{c_i} \right) = \bar{\Delta}_{bc}^{(n)} + \overline{p_b p_c} - \bar{p}_b \bar{p}_c$  and  $u_i$  is the

195 probability of an inbred line belonging to population  $i$ . Because this function is too complex to

196 interpret, the analysis of the LD value in an inbred lines panel relative to the LD in the inbreds from  
 197 each population is presented using the simulated data.

198 Due to population structure, associations involving unlinked SNP and QTL in linkage  
 199 equilibrium in the non-inbred populations can be declared. For simplicity, assume an inbred lines  
 200 panel with inbreds from two populations where an unlinked pair of SNP (alleles **C/c**) and QTL  
 201 (alleles **B/b**) is in linkage equilibrium. Let  $u_1$  and  $u_2$  be the proportions of inbreds from these  
 202 populations. Assuming that  $p$  and  $q$  are the allelic frequencies in one population, that  $r$  and  $s$  are the  
 203 allelic frequencies in the other population, and that  $p \neq q$  or  $r \neq s$ ,

$$204 \quad G_{CC}^{(n)} = m_b + \left( \frac{1}{u_1 p_c + u_2 r_c} \right) [u_1 (p_b - q_b) p_c + u_2 (r_b - s_b) r_c] a_b$$

$$205 \quad G_{cc}^{(n)} = m_b + \left( \frac{1}{u_1 q_c + u_2 s_c} \right) [u_1 (p_b - q_b) q_c + u_2 (r_b - s_b) s_c] a_b$$

206 If there is no population structure ( $u_1 = 1$  or  $0$ ),  $G_{CC}^{(n)} = G_{cc}^{(n)} = M_{IL}$ .

## 207 **Simulation**

208 We simulated 50 samples of populations with LD using the software *REALbreeding* (Viana *et*  
 209 *al.* 2016, 2013; Azevedo *et al.* 2015). This software has been developed by the first author using the  
 210 program *REALbasic 2009*. Population 1, generation 10r, is the advanced generation of a composite  
 211 of two populations in linkage equilibrium (population 1, generation 0) obtained after 10 generations  
 212 of random crosses, assuming a sample size of 400 individuals. Population 1, generations 10s and  
 213 10r10s, were obtained from Population 1, generation 0, assuming 10 generations of selfing and 10  
 214 generations of random crosses followed by 10 generations of selfing, respectively, assuming sample  
 215 sizes of 100 and 400, respectively. Populations 2, 3, and 4, generation 10s, are also inbred  
 216 populations (10 generations of selfing) derived from composites of two populations, also assuming  
 217 a sample size of 100. The parents of populations 2 and 3 were assumed to be non-improved and  
 218 improved populations, respectively. An improved population was defined as having frequencies of

219 favorable genes greater than 0.5, while a non-improved population was defined as having  
220 frequencies less than 0.5. A composite is a Hardy-Weinberg equilibrium population with LD for  
221 only linked markers and genes. In the case of a composite of two populations in linkage  
222 equilibrium,  $\Delta_{bc}^{(-1)} = \left( \frac{1 - 2\theta_{bc}}{4} \right) \left( p_b^1 - p_b^2 \right) \left( p_c^1 - p_c^2 \right)$ , where the indices 1 and 2 refer to the  
223 parental populations.

224 Based on our input, *REALbreeding* randomly distributed 10,000 SNPs, 10 QTLs (of higher  
225 effect) and 90 minor genes (QTLs of lower effect) in 10 chromosomes (1,000 SNPs and 10 genes  
226 by chromosome). The average SNP density was 0.1 cM. The genes were distributed in the regions  
227 covered by the SNPs. Four, three, two, and one QTLs were inserted in chromosomes 1, 5, 9, and 10,  
228 respectively. We also specified one SNP within each QTL and a minimum distance between linked  
229 QTLs of 10 cM. To allow *REALbreeding* to compute the phenotypic value for each genotyped  
230 individual, we informed the minimum and maximum genotypic values for homozygotes, proportion  
231 between the parameter  $a$  for a QTL and the parameter  $a$  for a minor gene ( $a_{QTL}/a_{mg}$ ), degree of  
232 dominance ( $(d/a)_i$ ,  $i = 1, \dots, 100$ ), direction of dominance, and broad sense heritability.  
233 *REALbreeding* saves two main files, one with the marker genotypes and another with the additive,  
234 dominance, and phenotypic values (non-inbred populations) or the genotypic and phenotypic values  
235 (inbred populations). The true additive and dominance genetic values or genotypic values are  
236 computed from the population gene frequencies (random values), LD values, average effects of  
237 gene substitution or  $a$  deviations, and dominance deviations. The phenotypic values are computed  
238 from the true population mean, additive and dominance values or genotypic values, and from error  
239 effects sampled from a normal distribution. The error variance is computed from the broad sense  
240 heritability.

241 We simulated three popcorn traits. The minimum and maximum genotypic values of  
242 homozygotes for grain yield, expansion volume, and days to maturity were 30 and 180 g per plant,  
243 15 and 65 mL/g, and 100 and 170 days, respectively. We defined positive dominance for grain yield

244  $(0 < (d/a)_i \leq 1.2)$ , bidirectional dominance for expansion volume  $(-1.2 \leq (d/a)_i \leq 1.2)$ , and no  
245 dominance for days to maturity  $((d/a)_i = 0)$ . The broad sense heritabilities were 0.4 and 0.8. These  
246 values can be associated with individual and progeny assessment, respectively. Assuming  $a_{QTL}/a_{mg}$   
247 = 10, each QTL explained approximately 4 and 8% of the phenotypic variance for heritabilities of  
248 0.4 and 0.8. The GWAS was performed in population 1, generations 10r and 10r10s, and in the  
249 inbred lines panel obtained from inbreds of the populations 1 through 4, generation 0 (generations  
250 10s). To assess the influence of the sample size on the GWAS efficiency, we considered sample  
251 sizes of 400 and 200. Thus, we used 100 or 50 inbreds from populations 1 through 4 to generate the  
252 inbred lines panel. To assess the influence of the QTL heritability on the GWAS efficiency, we  
253 converted four QTLs (QTLs 3, 7, 8, and 10 on chromosomes 1, 5, 9, and 10, respectively) to minor  
254 genes and assumed QTL heritability of 12% (for trait heritability of 0.7). Then, the GWAS was  
255 performed on population 1, generation 10r.

## 256 **Statistical analyses**

257 The analyses of LD and association were performed with the software *PowerMarker* (Liu and  
258 Muse 2005) for open-pollinated populations, and *Tassel* (Bradbury *et al.* 2007) for the inbred lines  
259 panel and RILs. Because there is no relationship between the inbred lines, the GWAS with the  
260 inbred lines panel was based on the general linear model, correcting for population structure (Q  
261 model). For the population structure analysis, we used *Structure* software (Falush *et al.* 2003) and  
262 fitted the admixture model with correlated allelic frequencies and the no admixture model with  
263 independent allelic frequencies. The number of SNPs, sample size, burn-in period, and number of  
264 MCMC (Monte Carlo Markov chain) replications were 100 (10 random SNPs by chromosome),  
265 400 (simulation 1), 10,000, and 40,000, respectively. The number of populations assumed (K)  
266 ranged from 1 to 7, and the most probable K value was determined based on the inferred plateau  
267 method (Viana *et al.* 2013). We used Benjamini-Hochberg FDR of 5 and 1% to control the type I  
268 error (Benjamini and Hochberg 1995).

269 To classify each significant association as true or false, we used a program developed in  
270 *REALbasic 2009* by the first author. The classification criterion was based on the difference  
271 between the position of the SNP and the position of a true QTL (candidate gene). If the difference  
272 was less than or equal to 2.5 cM (Yu *et al.* 2008), the association was classified as true. The GWAS  
273 efficiency was assessed based on the power of QTL detection (probability of rejecting  $H_0$  when  $H_0$   
274 is false; control of type II error), number of false-positive associations (control of type I error), bias  
275 in the estimated QTL position (precision of mapping), and range of the significant SNPs for the  
276 same QTL (Li *et al.* 2010).

### 277 **Data availability**

278 *REALbreeding* is available upon request. The data set is available at  
279 <https://dx.doi.org/10.6084/m9.figshare.3201838.v1>. Supplemental file S1 contains detailed  
280 description of all data files (SNP and QTL positions, SNP genotypes, and phenotypic values). Data  
281 citation:

282 Viana, José Marcelo; Mundim, Gabriel Borges; Fonseca e Silva, Fabyano; Augusto Franco Garcia,  
283 Antonio (2016): Efficiency of genome-wide association study in open-pollinated populations.  
284 figshare. <https://dx.doi.org/10.6084/m9.figshare.3201838.v1>

## 285 **RESULTS**

286 The results for assessing the efficiency of GWAS in open-pollinated populations refer to  
287 population 1, generation 10r. In generation 0, the degree of LD is so high that several significant  
288 associations are observed along the length of a chromosome with one or more QTLs or in one or  
289 more large chromosome regions (Figure 1). These several significant associations are not false-  
290 positive (at least most of them). This is due to the degree of LD and presence of QTL. Even  
291 assuming a FDR of 1%, it is worthless for the identification of candidate genes to infer that there  
292 are one or more QTLs in a chromosome region spanning 20 cM. When the LD between a QTL and  
293 one or more markers is restricted to SNPs very close to or within the QTL, the analysis can be

294 highly efficient, depending mainly on the QTL effect and sample size. Assuming a QTL heritability  
295 of 8% and sample size 400 (simulation 1), the significant associations for expansion volume  
296 observed in chromosome 1 evidenced five QTLs with a FDR of 5% or four QTLs with a FDR of  
297 1% (Figure 1). This implies in a QTL detection power of 100%. Three of the four true QTLs  
298 (candidate genes) were identified by SNPs located within the QTL while one was identified by five  
299 or four SNPs in a region spanning approximately 2.0 or 1.7 cM, respectively, depending on the  
300 FDR. The significant associations at a FDR of 5 or 1% for SNPs 223 (at position 21.7 cM), 243 (at  
301 position 23.3), 245 (at position 23.4 cM), and 252 (at position 23.7 cM) are attributable to their LD  
302 with QTL 2. The absolute LD values are 0.1488, 0.1494, 0.1747, and 0.1416, respectively (with  
303 highly significant P values according to the chi-square test). The significant association at a FDR of  
304 5% for SNP 627 (at position 61.8 cM) is not a false-positive, since it is in LD with QTL 2 ( $|\Delta| =$   
305 0.0366, chi-square test P value = 3.22E-6) and QTL 3 ( $|\Delta| = 0.0302$ , chi-square test P value =  
306 7.55E-5). Then, the result is interpreted as a fifth QTL.

307       Only for intermediate to high QTL heritability (8 and 12%) and greater sample size were the  
308 results from GWAS clearly different between days to maturity and the other two traits, except for  
309 the power of QTL detection (Table 1). The number of significant associations, number of false-  
310 positives, bias in QTL position, and average range of chromosome regions with one or more QTLs  
311 were greater in the absence of dominance. With a FDR of 5%, the power of QTL detection ranged  
312 from 88 to 100% but was associated with a high number of significant associations in chromosomes  
313 with one to four QTLs. On average, each true QTL was identified based on two to three (for days to  
314 maturity) SNPs, in chromosome regions spanning 0.8 to 2.2 cM. The bias in QTL position ranged  
315 from 0.5 to 0.8 cM. Increasing the control of the type I error provided better results and greatly  
316 reduced the number of false-positive associations. The power of QTL detection ranged from 75 to  
317 100% and each QTL was identified based on one to two SNPs in chromosome regions spanning 0.4  
318 to 1.1 cM. The bias in QTL position ranged from 0.3 to 0.6 cM.

319           Assuming a QTL heritability of 8% and sample size of 200 or a QTL heritability of 4% and  
320 sample size of 400, it is better to assume a FDR of 5% to ensure greater power of QTL detection  
321 and fewer false-positive associations. However, the power of detection ranged from 33 to 39%,  
322 particularly due to the lower QTL effect (Table 1). With lower QTL heritability and reduced sample  
323 size, GWAS is ineffective, showing an average power of QTL detection less than or equal to 5%.  
324 This scenario does not improve when increasing the FDR to 10% (data not shown). Increasing the  
325 QTL heritability to 12% resulted in an increase in the power of QTL detection, particularly when  
326 assuming a sample size of 200 individuals (Table 1). There were also increases in bias in the QTL  
327 position, range of chromosome regions with an identified QTL, number of false-positives, and  
328 number of significant associations in chromosomes with one to two QTLs, mainly with greater  
329 sample size. When assuming 200 individuals, the power of QTL detection reached 70–75%,  
330 regardless of the trait.

331           We also provided results for comparing GWAS in open-pollinated population and in an  
332 inbred lines panel. An impressive result from GWAS with an inbred lines panel is the efficacy of  
333 discarding spurious associations due to population structure (Figure 2). The number of spurious  
334 associations in chromosome 3 (no QTL) were reduced from 477 to zero in the analysis of expansion  
335 volume assuming a FDR of 1%, QTL heritability of 8%, and sample size 400 (simulation 1).  
336 Correcting for population structure decreased the number of significant associations in chromosome  
337 1 (four QTLs) from 464 to 9. This implies a QTL detection power of 100% but with three to five  
338 false-positive associations. The population structure analysis evidenced four subpopulations (Figure  
339 3). In general, the efficiency of GWAS was greater with the inbred lines panel (Table 2). The power  
340 of QTL detection was higher, and the number of false-positive associations was lower. Furthermore,  
341 only SNPs within QTL showed significant associations in general. Also, no differences were  
342 observed between the traits and similarly for open-pollinated populations the analysis is ineffective  
343 when assuming lower QTL heritability and sample size.



344 The following were indicated by analysis of the parametric LD in the populations and in the  
345 inbred lines panel based on a random 10 cM segment of chromosome 1 (100 SNPs): higher LD in  
346 population 1, generation 0 (average absolute  $\Delta = 0.0403$ ; 627 values greater than 0.1), lower LD in  
347 population 3, generation 0 (average absolute  $\Delta = 0.0203$ ; 48 values greater than 0.1), a slight  
348 decrease in the LD with selfing (5–6%), and the lowest LD in the inbred lines panel (average  
349 absolute  $\Delta = 0.0249$ ; 8 values greater than 0.1) (Figures 4 and 5). The LD decay due to 10  
350 generations of random crosses was approximately 25%, regardless of the population. For example,  
351 the number of absolute LD values greater than 0.1 decreased 60% in population 1, generation 10r.

352 Compared to GWAS in population 1, generation 10r, at a FDR of 5%, the GWAS with RILs  
353 from population 1, generation 10r (lowest parametric LD among the non-inbred populations), at a  
354 FDR of 1%, showed the same power of QTL detection and a high number of significant  
355 associations along the length of one or more chromosomes with one to four QTLs (Table 2). As  
356 explained, this makes the GWAS ineffective for identifying candidate genes. Compared to GWAS  
357 in generation 10r, the lower efficiency of GWAS with RILs for identifying candidate genes (due to  
358 a greater number of significant associations in chromosomes with one to four QTLs) can be  
359 attributed to higher heritability, due to increase in the genotypic variance for the same error  
360 variance, and higher estimated LD. Based on simulation 1, the estimated QTL heritability with RILs  
361 was approximately 9% for the three traits, assuming QTL heritability of 8% and 400 individuals  
362 assessed in generation 10r (12.5% greater than the heritability at generation 10r). Due to sampling,  
363 the estimated LD was greater with RILs than with non-inbred plants in generation 10r (Figure 6).  
364 Based on simulation 1, the average estimated  $\Delta$  and  $r^2$  values were 0.0252 and 0.0241 for the RILs  
365 and 0.0235 and 0.0225 for generation 10r, respectively. Although these average values are  
366 equivalent, the estimated  $\Delta$  values with RILs were four times greater on average than the estimated  
367  $\Delta$  values in generation 10r. Once again, the GWAS was ineffective when assuming low heritability  
368 and reduced sample size.

369

## DISCUSSION

370 The presented theory proves that a significant association from a GWAS in a non-inbred or  
371 inbred open-pollinated population and in an inbred lines panel, while controlling the type I error  
372 rate and correcting for population structure and relatedness, is due to LD between the SNP and one  
373 or more linked QTLs. The theory also shows that GWAS provides estimation of the average effect  
374 of a SNP substitution (and consequently the estimation of SNP effects). Schaefer and Bernardo  
375 (2013) estimated SNP effects for days to anthesis, days to silking, oil and starch concentration, and  
376 measures of disease resistance using a maize inbred lines panel. We showed that only if there is a  
377 single QTL in LD with a significant SNP it is adequate to test dominance for the QTL loci. It is  
378 important to highlight that only if there is a single QTL in LD with a significant SNP, if the SNP is  
379 within the QTL, and if QTL and SNP alleles have the same frequency it is adequate to consider the  
380 SNP average effect of substitution as the QTL average effect of substitution. Furthermore, we also  
381 proved that a significant association due to admixture LD (population structure) does not depend on  
382 linkage disequilibrium between the SNP and a linked QTL.

383 To our knowledge, this is the first study on GWAS efficiency in open-pollinated population.  
384 The results are very encouraging and show that the process can be highly efficient, depending on  
385 LD, sample size, and QTL effect. In an open-pollinated population, the LD measure depends also  
386 on the SNP and QTL allele frequencies. Thus, significant associations involving several SNPs with  
387 the same QTL can be observed, including SNPs that are tens of mega base pairs (or centiMorgans)  
388 from the QTL. In reality, a closely linked QTL and SNP can have a lower LD value compared to a  
389 more distant QTL and SNP pair. In populations with low levels of LD, significant associations are  
390 expected to occur for only SNPs within the QTL or located very close to the QTL (within a few  
391 hundred base pairs), which favors the identification of a candidate gene for the QTL. In this  
392 scenario, a QTL would be declared based on one to a small number of significant associations  
393 spanning a chromosome region of a few kilo base pairs (not mega base pairs or centiMorgans).

394 A genome-wide association study is ineffective for lower sample size (200 individuals) and  
395 QTL heritability (4%), regardless of the population, i.e., including inbred lines panel and RILs. This  
396 scenario does not improve when increasing the FDR. Thus, we recommend that breeders employ  
397 larger sample size (400 individuals) and achieve high trait heritability (70–80%) (such as by  
398 genotyping parents and phenotyping replicated progeny). With intermediate (8%) to high (12%)  
399 QTL heritability and larger sample size, it is important to define a FDR of 1% to decrease the  
400 number of false-positive associations (note that some associations cannot really be false-positives).  
401 According to Larsson *et al.* (2013), false-positive associations can arise from markers that are in  
402 long-range LD with causative polymorphisms, which despite being rare are typically unaccounted  
403 for in association studies.

404 Our results are comparable to those obtained by Yu *et al.* (2008) in a simulation study  
405 investigating the genetic and statistical properties (power of QTL detection and FDR) of the nested  
406 association mapping (NAM) design. With 5,000 genotypes, they achieved an average power of  
407 QTL detection of 57% (with a range of 30 to 85%) when considering two trait heritabilities (0.4 and  
408 0.7) and two different numbers of QTL controlling the trait (20 and 50). They also observed that a  
409 higher heritability always gave higher QTL detection power, particularly for QTL with moderate to  
410 small effect. Hung *et al.* (2012) assessed the maize NAM population and achieved heritabilities  
411 greater than 0.8 for traits related to flowering time and plant architecture, resulting in a good power  
412 to detect QTL. In contrast, traits with lower heritabilities (up to 0.6) and stronger sensitivity to  
413 environmental variation allow only a reasonable power of QTL detection. Also using the NAM  
414 population, Kump *et al.* (2011) evaluated resistance to southern leaf blight (SLB) disease and  
415 obtained a heritability of 87%. They identified 32 QTLs with predominantly small and additive  
416 effects on SLB resistance and many of the SNPs within and outside of QTL intervals were also  
417 within or near to genes previously shown to be involved in plant disease resistance.

418 Field results have demonstrated that GWAS are best carried out with a large sample size (Yu  
419 and Buckler 2006). According to Flint-Garcia *et al.* (2005), increasing the population size increases  
420 the number of individuals with rare alleles, thus improving the power to test the association between  
421 these rare alleles and the trait of interest. Yu *et al.* (2008) showed that the gain in efficiency by  
422 increasing sample size was evidenced by increased power of QTL detection and smaller FDR,  
423 mainly with heritability of 0.7 in comparison with a heritability of 0.4. Based on a simulation study,  
424 Long and Langley (1999) demonstrated that approximately 500 individuals should be genotyped for  
425 20 SNP loci within the candidate gene region to detect marker-trait associations for QTLs that  
426 account for as little as 5% of the phenotypic variation. They observed that more power was  
427 achieved by increasing the population size than by increasing the SNP density within the candidate  
428 gene.

429 Compared to QTL mapping, GWAS is much more precise for mapping QTLs and identifying  
430 candidate genes. In QTL mapping studies based on simulated data, the bias in QTL position ranged  
431 from 2.0 to 6.0 cM depending on sample size, heritability, and marker density (Li *et al.* 2010). The  
432 bias with GWAS should be much lower because the significant SNPs are frequently within or very  
433 close to the candidate genes.

434 Compared to GWAS in an inbred lines panel, GWAS in open-pollinated population was less  
435 efficient, i.e., showed slightly lower power of QTL detection, higher number of false-positive  
436 associations, slightly higher bias in QTL position, and higher number of significant associations for  
437 the same QTL. The increase in efficiency by using the inbred lines panel was due to the lower  
438 degree of LD achieved by mixing groups of inbreds with positive and negative LD values. This is  
439 probably the main advantage of GWAS based on inbred lines panel. In contrast, when fixing the  
440 FDR, GWAS in a non-inbred population tends to be more efficient than GWAS with RILs from the  
441 same population. According to Flint-Garcia *et al.* (2005), the inbred lines panel exploits the rapid  
442 breakdown of LD in diverse maize lines, enabling very high resolution for QTL mapping.

443 Population structure results from constructing a panel with inbreds from various breeding programs  
444 and distinct heterotic groups, which can cause false-positive marker-trait associations if the data is  
445 not corrected (Yan *et al.* 2009). The lowest parametric LD values for the inbred lines panel occurred  
446 in published studies (Yan *et al.* 2009, Remington *et al.* 2001). Moreover, with the inbred lines  
447 panel, generally, only SNP loci within the QTL showed significant association, which is a  
448 highlighted result from GWAS that can serve as a basis for a fine mapping strategy for marker-  
449 assisted selection and map-based cloning genes (Gupta *et al.* 2005).

450 GWAS in plant breeding has been effective for identifying candidate genes for quantitative  
451 traits such as plant architecture, kernel composition, root development, flowering time, drought  
452 tolerance, pathogen resistance, and metabolic processes (Zhu *et al.* 2008). Based on our evidence,  
453 breeders can employ non-inbred and inbred breeding populations while taking into account that the  
454 level of LD should be low, the sample size should be higher than that necessary for QTL mapping,  
455 and the QTL heritability should be intermediate to high to achieve greater power of QTL detection  
456 and precise mapping of candidate genes.

#### 457 **ACKNOWLEDGMENTS**

458 We thank the National Council for Scientific and Technological Development (CNPq), the  
459 Brazilian Federal Agency for Support and Evaluation of Graduate Education (Capes), and the  
460 Foundation for Research Support of Minas Gerais State (Fapemig) for financial support.

#### 461 **LITERATURE CITED**

- 462 Azevedo, C. F., M. D. V. Resende, F. F. Silva, J. M. S. Viana, M. S. F. Valente *et al.*, 2015 Ridge,  
463 Lasso and Bayesian additive-dominance genomic models. *BMC Genet.* 16: 105-118.
- 464 Barendse, W., A. Reverter, R. J. Bunch, B. E. Harrison, W. Barris *et al.*, 2007 A validated whole-  
465 genome association study of efficient food conversion in cattle. *Genetics* 176: 1893-905.
- 466 Benjamini, Y., and Y. Hochberg, 1995 Controlling the false discovery rate: a practical and powerful  
467 approach to multiple testing. *J. R. Stat. Soc.* 57: 289-300.

- 468 Bernardo, R., 2013 Genomewide markers for controlling background variation in association  
469 mapping. *Plant Genome* 6.
- 470 Bradbury, P. J., Z. Zhang, D. E. Kroon, T. M. Casstevens, Y. Ramdoss *et al.*, 2007 TASSEL:  
471 software for association mapping of complex traits in diverse samples. *Bioinformatics* 23: 2633-  
472 2635.
- 473 Falush, D., M. Stephens, and J. K. Pritchard, 2003 Inference of population structure using  
474 multilocus genotype data: linked loci and correlated allele frequencies. *Genetics* 164: 1567-1587.
- 475 Flint-Garcia, S. A., J. M. Thornsberry, and E. S. Buckler, 2003 Structure of linkage disequilibrium  
476 in plants. *Annu. Rev. Plant Biol.* 54: 357-374.
- 477 Flint-Garcia, S. A., A. C. Thuillet, J. Yu, G. Pressoir, S. M. Romero *et al.*, 2005 Maize association  
478 population: a high-resolution platform for quantitative trait locus dissection. *Plant J.* 44: 1054-  
479 1064.
- 480 Gupta, P. K., S. Rustgi, and P. L. Kulwal, 2005 Linkage disequilibrium and association studies in  
481 higher plants: present status and future prospects. *Plant Mol. Biol.* 57: 461-485.
- 482 Hill, W. G., and A. Robertson, 1968 Linkage disequilibrium in finite populations. *Theor. Appl.*  
483 *Genet.* 38: 226-231.
- 484 Hung, H. Y., C. Browne, K. Guill, N. Coles, M. Eller *et al.*, 2012 The relationship between parental  
485 genetic or phenotypic divergence and progeny variation in the maize nested association mapping  
486 population. *Heredity* 108: 490-499.
- 487 Ingvarsson, P. K., and N. R. Street, 2011 Association genetics of complex traits in plants. *New*  
488 *Phytol.* 189: 909-922.
- 489 Kempthorne, O., 1957 *An Introduction to Genetic Statistics*. John Wiley and Sons Inc., New York.
- 490 Kump, K. L., P. J. Bradbury, R. J. Wisser, E. S. Buckler, A. R. Belcher *et al.*, 2011 Genome-wide  
491 association study of quantitative resistance to southern leaf blight in the maize nested association  
492 mapping population. *Nat. Genet.* 43: 163-169.

- 493 Larsson, S. J., A. E. Lipka, and E. S. Buckler, 2013 Lessons from Dwarf8 on the strengths and  
494 weaknesses of structured association mapping. *Plos Genet.* 9: e1003246.
- 495 Li, H., S. Hearne, M. Banziger, Z. Li, and J. Wang, 2010 Statistical properties of QTL linkage  
496 mapping in biparental genetic populations. *Heredity* 105: 257-267.
- 497 Liu, K., and S. V. Muse, 2005 PowerMarker: integrated analysis environment for genetic marker  
498 data. *Bioinformatics* 21: 2128-2129.
- 499 Long, A. D., and C. H. Langley, 1999 The power of association studies to detect the contribution of  
500 candidate genetic loci to variation in complex traits. *Genome Res.* 9: 720-731.
- 501 Pace, J., C. Gardner, C. Romay, B. Ganapathysubramanian, and T. Lübberstedt, 2015 Genome-wide  
502 association analysis of seedling root development in maize (*Zea mays* L.). *BMC Genomics* 16:  
503 47-58.
- 504 Pearson, T. A., and T. A. Manolio, 2008 How to interpret a genome-wide association study. *J. Am.*  
505 *Med. Assoc.* 299: 1335-1344.
- 506 Rafalski, J. A., 2010 Association genetics in crop improvement. *Curr. Opin. Plant Biol.* 13: 174-  
507 180.
- 508 Remington, D. L., J. M. Thornsberry, Y. Matsuoka, L. M. Wilson, S. R. Whitt *et al.*, 2001 Structure  
509 of linkage disequilibrium and phenotypic associations in the maize genome. *PNAS* 98: 11479-  
510 11484.
- 511 Schaefer, C. M., and R. Bernardo, 2013 Genome-wide association mapping of flowering time,  
512 kernel composition, and disease resistance in historical Minnesota maize inbreds. *Crop Sci.* 53:  
513 2518-2529.
- 514 Stich, B., and A. E. Melchinger, 2009 Comparison of mixed-model approaches for association  
515 mapping in rapeseed, potato, sugar beet, maize, and Arabidopsis. *BMC Genomics* 10: e94.

- 516 Thirunavukkarasu, N., F. Hossain, K. Arora, R. Sharma, K. Shiriga *et al.*, 2014 Functional  
517 mechanisms of drought tolerance in subtropical maize (*Zea mays* L.) identified using genome-  
518 wide association mapping. *BMC Genomics* 15: 1182-1193.
- 519 Viana, J. M. S., H.-P. Piepho, and F. F. Silva, 2016 Quantitative genetics theory for genomic  
520 selection and efficiency of breeding value prediction in open-pollinated populations. *Sci. Agric.*  
521 73: 243-251.
- 522 Viana, J. M. S., M. S. F. Valente, F. F. Silva, G. B. Mundim, and G. P. Paes, 2013 Efficacy of  
523 population structure analysis with breeding populations and inbred lines. *Genetica* 141: 389-399.
- 524 Weir, B. S., 2008 Linkage disequilibrium and association mapping. *Ann. Rev. Genomics Hum.*  
525 *Genet.* 9: 129-142.
- 526 Weir, B., 2010 Statistical genetic issues for genome-wide association studies. *Genome* 53: 869-875.
- 527 Yan, J. B., T. Shah, M. Warburton, E. S. Buckler, M. D. McMullen *et al.*, 2009 Genetic  
528 characterization of a global maize collection using SNP markers. *Plos One* 4: e8451.
- 529 Yang, X., J. Yan, T. Shah, M. L. Warbuton, Q. Li *et al.*, 2010 Genetic analysis and characterization  
530 of a new maize association mapping panel for quantitative trait loci dissection. *Theor. Appl.*  
531 *Genet.* 121: 417-431.
- 532 Yu, J., and E. S. Buckler, 2006 Genetic association mapping and genome organization of maize.  
533 *Curr. Opin. Biotechnol.* 17: 1-6.
- 534 Yu, J., J. B. Holland, M. D. McMullen, and E. S. Buckler, 2008 Genetic design and statistical  
535 power of nested association mapping in maize. *Genetics* 178: 539-551.
- 536 Yu, J., G. Pressoir, W. H. Briggs, I. Vroh Bi, M. Yamasaki *et al.*, 2006 A unified mixed-model  
537 method for association mapping that accounts for multiple levels of relatedness. *Nat. Genet.* 38:  
538 203-208.
- 539 Zhu, C., M. Gore, E. S. Buckler, and J. Yu, 2008 Status and prospects of association mapping in  
540 plants. *Plant Genome* 1: 5-20.



541 **Table 1** Average number of significant associations with a FDR of 5 or 1%, power of QTL detection (%), number of false-positive associations in  
 542 chromosomes with no QTL and one to four QTLs, bias in the QTL position (cM), and average range for the regions with identified QTL, regarding  
 543 population 1, generation 10r (random cross), three traits (expansion volume (EV; mL/g), grain yield (GY; g per plant), and days to maturity (DM)), two  
 544 sample sizes, and three QTL heritabilities<sup>a</sup>

| FDR | Trait | Sample | h <sup>2</sup> | Sig. Assoc.    | Power            | False+0     | False+1-4    | Bias              | Av. range         |
|-----|-------|--------|----------------|----------------|------------------|-------------|--------------|-------------------|-------------------|
| 5%  | EV    | 400    | 4%             | 6.7 (0; 22)    | 37.2 (0; 80)     | 0.6 (0; 5)  | 0.9 (0; 8)   | 0.21 (0.00; 0.98) | 0.28 (0.00; 2.45) |
|     |       |        | 8%             | 32.1 (13; 73)  | 88.6 (60; 100)   | 3.3 (0; 17) | 7.9 (1; 28)  | 0.52 (0.09; 0.83) | 0.84 (0.11; 2.18) |
|     |       |        | 12%            | 26.8 (7; 63)   | 99.2 (60; 100)   | 2.9 (0; 11) | 8.1 (0; 30)  | 0.59 (0.00; 0.92) | 1.27 (0.00; 2.74) |
|     |       | 200    | 4%             | 0.8 (0; 5)     | 5.2 (0; 40)      | 0.2 (0; 2)  | 0.3 (0; 1)   | 0.22 (0.00; 1.76) | 0.14 (0.00; 1.31) |
|     |       |        | 8%             | 6.2 (0; 33)    | 37.0 (0; 70)     | 0.5 (0; 3)  | 1.1 (0; 12)  | 0.16 (0.00; 0.88) | 0.17 (0.00; 1.42) |
|     |       |        | 12%            | 6.0 (2; 20)    | 70.8 (20; 100)   | 0.5 (0; 4)  | 0.8 (0; 5)   | 0.18 (0.00; 0.87) | 0.25 (0.00; 1.58) |
|     | GY    | 400    | 4%             | 5.7 (0; 25)    | 34.4 (0; 90)     | 0.4 (0; 2)  | 0.8 (0; 7)   | 0.20 (0.00; 0.85) | 0.18 (0.00; 1.03) |
|     |       |        | 8%             | 31.3 (10; 82)  | 87.8 (70; 100)   | 3.3 (0; 12) | 7.5 (0; 28)  | 0.51 (0.00; 0.97) | 0.77 (0.00; 1.54) |
|     |       |        | 12%            | 31.6 (8; 74)   | 99.6 (80; 100)   | 3.6 (0; 16) | 9.8 (0; 43)  | 0.68 (0.14; 1.01) | 1.39 (0.12; 2.60) |
|     |       | 200    | 4%             | 0.8 (0; 16)    | 3.8 (0; 30)      | 0.6 (0; 4)  | 0.4 (0; 6)   | 0.15 (0.00; 1.39) | 0.06 (0.00; 0.94) |
|     |       |        | 8%             | 5.9 (0; 18)    | 32.6 (10; 80)    | 0.8 (0; 8)  | 1.1 (0; 7)   | 0.16 (0.00; 0.97) | 0.16 (0.00; 1.75) |
|     |       |        | 12%            | 7.2 (3; 19)    | 74.8 (20; 100)   | 0.7 (0; 7)  | 1.2 (0; 6)   | 0.21 (0.00; 0.75) | 0.30 (0.00; 1.49) |
|     | DM    | 400    | 4%             | 8.6 (0; 33)    | 39.0 (0; 100)    | 1.1 (0; 5)  | 1.4 (0; 9)   | 0.29 (0.00; 0.70) | 0.38 (0.00; 1.64) |
|     |       |        | 8%             | 50.7 (12; 119) | 92.8 (70; 100)   | 6.5 (0; 21) | 14.9 (3; 48) | 0.65 (0.06; 1.02) | 1.22 (0.07; 2.82) |
|     |       |        | 12%            | 50.2 (20; 110) | 100.0 (100; 100) | 6.5 (0; 23) | 18.4 (3; 50) | 0.77 (0.49; 1.05) | 2.02 (0.76; 3.49) |
|     |       | 200    | 4%             | 1.0 (0; 7)     | 5.0 (0; 30)      | 0.5 (0; 2)  | 0.5 (0; 3)   | 0.17 (0.00; 0.82) | 0.15 (0.00; 2.45) |
|     |       |        | 8%             | 6.6 (0; 41)    | 34.0 (0; 70)     | 0.7 (0; 3)  | 1.2 (0; 12)  | 0.23 (0.00; 0.91) | 0.27 (0.00; 2.00) |
|     |       |        | 12%            | 8.8 (2; 31)    | 75.2 (40; 100)   | 1.0 (0; 9)  | 1.9 (0; 12)  | 0.26 (0.00; 0.96) | 0.35 (0.00; 1.38) |
| 1%  | EV    | 400    | 8%             | 15.0 (7; 39)   | 76.6 (50; 100)   | 0.4 (0; 3)  | 2.0 (0; 13)  | 0.32 (0.00; 0.75) | 0.41 (0.00; 1.70) |
|     |       |        | 12%            | 13.3 (4; 38)   | 98.4 (60; 100)   | 0.5 (0; 2)  | 2.7 (0; 16)  | 0.40 (0.00; 0.79) | 0.65 (0.00; 1.92) |
|     | GY    | 400    | 8%             | 14.8 (6; 39)   | 75.4 (60; 100)   | 0.3 (0; 3)  | 2.1 (0; 10)  | 0.33 (0.00; 0.80) | 0.43 (0.00; 1.32) |
|     |       |        | 12%            | 15.6 (5; 43)   | 98.4 (80; 100)   | 0.6 (0; 7)  | 3.2 (0; 21)  | 0.53 (0.03; 0.81) | 0.82 (0.03; 1.63) |
|     | DM    | 400    | 8%             | 20.6 (6; 51)   | 80.0 (40; 100)   | 0.6 (0; 3)  | 4.1 (0; 19)  | 0.44 (0.00; 0.93) | 0.61 (0.00; 1.99) |
|     |       |        | 12%            | 22.3 (8; 49)   | 100.0 (100; 100) | 0.9 (0; 6)  | 6.5 (0; 21)  | 0.58 (0.02; 0.99) | 1.14 (0.03; 2.98) |

<sup>a</sup>the values between parentheses are the minimum and maximum.

545 **Table 2** Average number of significant associations with a FDR of 5 or 1%, power of QTL detection (%), number of false-positive associations in  
 546 chromosomes with no QTL and one to four QTLs, bias in the QTL position (cM), and average range for the regions with identified QTL, regarding an  
 547 inbred lines panel and RILs from population 1, generation 10r (random cross), three traits (expansion volume (EV; mL/g), grain yield (GY; g per  
 548 plant), and days to maturity (DM)), two sample sizes, and two QTL heritabilities<sup>a</sup>

| Population         | FDR | Trait | Sample         | h2             | Sig. Assoc.    | Power          | False+0           | False+1-4         | Bias              | Av. range         |                   |
|--------------------|-----|-------|----------------|----------------|----------------|----------------|-------------------|-------------------|-------------------|-------------------|-------------------|
| Inbred lines panel | 5%  | EV    | 400            | 4%             | 6.9 (2; 14)    | 58.0 (20; 100) | 0.3 (0; 2)        | 0.6 (0; 4)        | 0.04 (0.00; 0.35) | 0.04 (0.00; 0.42) |                   |
|                    |     |       |                | 8%             | 14.6 (9; 27)   | 96.0 (90; 100) | 0.5 (0; 2)        | 3.1 (0; 13)       | 0.12 (0.00; 0.70) | 0.14 (0.00; 0.58) |                   |
|                    |     |       | 200            | 4%             | 0.7 (0; 5)     | 5.4 (0; 40)    | 0.1 (0; 1)        | 0.4 (0; 1)        | 0.09 (0.00; 0.92) | 0.06 (0.00; 1.12) |                   |
|                    |     | 8%    |                | 5.4 (0; 10)    | 45.2 (0; 80)   | 0.1 (0; 1)     | 0.6 (0; 4)        | 0.04 (0.00; 0.69) | 0.05 (0.00; 1.04) |                   |                   |
|                    |     | GY    | 400            | 4%             | 7.9 (2; 17)    | 61.4 (20; 100) | 0.4 (0; 3)        | 1.0 (0; 5)        | 0.05 (0.00; 0.28) | 0.05 (0.00; 0.33) |                   |
|                    |     |       |                | 8%             | 13.9 (7; 23)   | 96.2 (70; 100) | 0.3 (0; 2)        | 2.8 (0; 11)       | 0.11 (0.00; 0.41) | 0.12 (0.00; 0.50) |                   |
|                    | 200 |       | 4%             | 1.0 (0; 5)     | 8.2 (0; 30)    | 0.2 (0; 2)     | 0.2 (0; 2)        | 0.00 (0.00; 0.00) | 0.00 (0.00; 0.00) |                   |                   |
|                    |     | 8%    | 5.1 (0; 13)    | 42.6 (0; 70)   | 0.2 (0; 2)     | 0.5 (0; 5)     | 0.05 (0.00; 0.72) | 0.04 (0.00; 1.04) |                   |                   |                   |
|                    | DM  | 400   | 4%             | 4%             | 9.1 (4; 15)    | 70.8 (40; 90)  | 0.4 (0; 2)        | 1.2 (0; 5)        | 0.06 (0.00; 0.62) | 0.05 (0.00; 0.52) |                   |
|                    |     |       |                | 8%             | 15.4 (8; 29)   | 96.0 (80; 100) | 0.5 (0; 3)        | 3.7 (0; 17)       | 0.14 (0.00; 0.43) | 0.17 (0.00; 0.57) |                   |
|                    |     |       | 200            | 4%             | 1.1 (0; 6)     | 9.6 (0; 40)    | 0.1 (0; 1)        | 0.1 (0; 1)        | 0.01 (0.00; 0.23) | 0.00 (0.00; 0.05) |                   |
|                    |     | 8%    |                | 5.6 (0; 12)    | 46.8 (0; 80)   | 0.1 (0; 2)     | 0.6 (0; 4)        | 0.05 (0.00; 0.53) | 0.04 (0.00; 0.54) |                   |                   |
| RILs               |     | 1%    | EV             | 400            | 8%             | 10.8 (6; 21)   | 91.6 (60; 100)    | 0.1 (0; 1)        | 1.0 (0; 10)       | 0.05 (0.00; 0.63) | 0.06 (0.00; 0.61) |
|                    |     |       |                |                | 8%             | 10.2 (7; 15)   | 91.2 (70; 100)    | 0.0 (0; 1)        | 0.7 (0; 6)        | 0.03 (0.00; 0.23) | 0.03 (0.00; 0.26) |
|                    | DM  |       | 400            | 8%             | 10.7 (7; 16)   | 91.6 (70; 100) | 0.0 (0; 1)        | 1.0 (0; 5)        | 0.07 (0.00; 0.39) | 0.07 (0.00; 0.47) |                   |
|                    |     | EV    |                | 400            | 4%             | 7.3 (1; 31)    | 39.0 (10; 70)     | 0.1 (0; 2)        | 1.7 (0; 12)       | 0.17 (0.00; 0.73) | 0.25 (0.00; 1.25) |
|                    | 8%  |       | 34.5 (4; 122)  |                | 87.0 (40; 100) | 0.3 (0; 2)     | 12.7 (0; 68)      | 0.61 (0.00; 1.05) | 0.90 (0.00; 2.43) |                   |                   |
|                    | 200 |       | 8%             | 4.9 (0; 24)    | 27.0 (0; 70)   | 0.1 (0; 2)     | 1.1 (0; 9)        | 0.15 (0.00; 1.15) | 0.20 (0.00; 1.42) |                   |                   |
| GY                 |     | 400   | 4%             | 9.5 (2; 42)    | 43.0 (10; 70)  | 0.1 (0; 1)     | 2.8 (0; 23)       | 0.30 (0.00; 1.09) | 0.41 (0.00; 2.00) |                   |                   |
|                    | 8%  |       | 34.1 (5; 123)  | 86.0 (50; 100) | 0.2 (0; 2)     | 12.9 (0; 73)   | 0.60 (0.00; 1.05) | 0.88 (0.00; 2.29) |                   |                   |                   |
|                    | 200 | 8%    | 6.3 (0; 27)    | 30.0 (0; 60)   | 0.1 (0; 4)     | 1.8 (0; 16)    | 0.22 (0.00; 1.29) | 0.30 (0.00; 2.71) |                   |                   |                   |
| DM                 |     | 400   | 4%             | 16.6 (4; 65)   | 61.0 (30; 100) | 0.2 (0; 2)     | 5.2 (0; 44)       | 0.47 (0.00; 1.09) | 0.62 (0.00; 1.94) |                   |                   |
|                    | 8%  |       | 40.4 (11; 142) | 89.0 (70; 100) | 0.4 (0; 3)     | 15.8 (0; 81)   | 0.66 (0.12; 1.07) | 1.01 (0.13; 2.62) |                   |                   |                   |
|                    | 200 | 8%    | 7.4 (0; 42)    | 32.0 (0; 80)   | 0.2 (0; 3)     | 2.1 (0; 15)    | 0.26 (0.00; 1.21) | 0.36 (0.00; 2.11) |                   |                   |                   |
| 5%                 |     | EV    | 200            | 4%             | 1.8 (0; 34)    | 7.0 (0; 30)    | 0.2 (0; 1)        | 1.2 (0; 23)       | 0.19 (0.00; 1.12) | 0.33 (0.00; 2.47) |                   |
|                    | 4%  |       |                | 2.9 (0; 19)    | 11.0 (0; 30)   | 0.3 (0; 1)     | 1.5 (0; 9)        | 0.41 (0.00; 1.77) | 0.67 (0.00; 3.59) |                   |                   |
|                    | DM  | 200   | 4%             | 4.6 (0; 33)    | 17.0 (0; 50)   | 0.3 (0; 2)     | 2.0 (0; 19)       | 0.32 (0.00; 1.26) | 0.37 (0.00; 1.81) |                   |                   |

<sup>a</sup>the values between parentheses are the minimum and maximum.

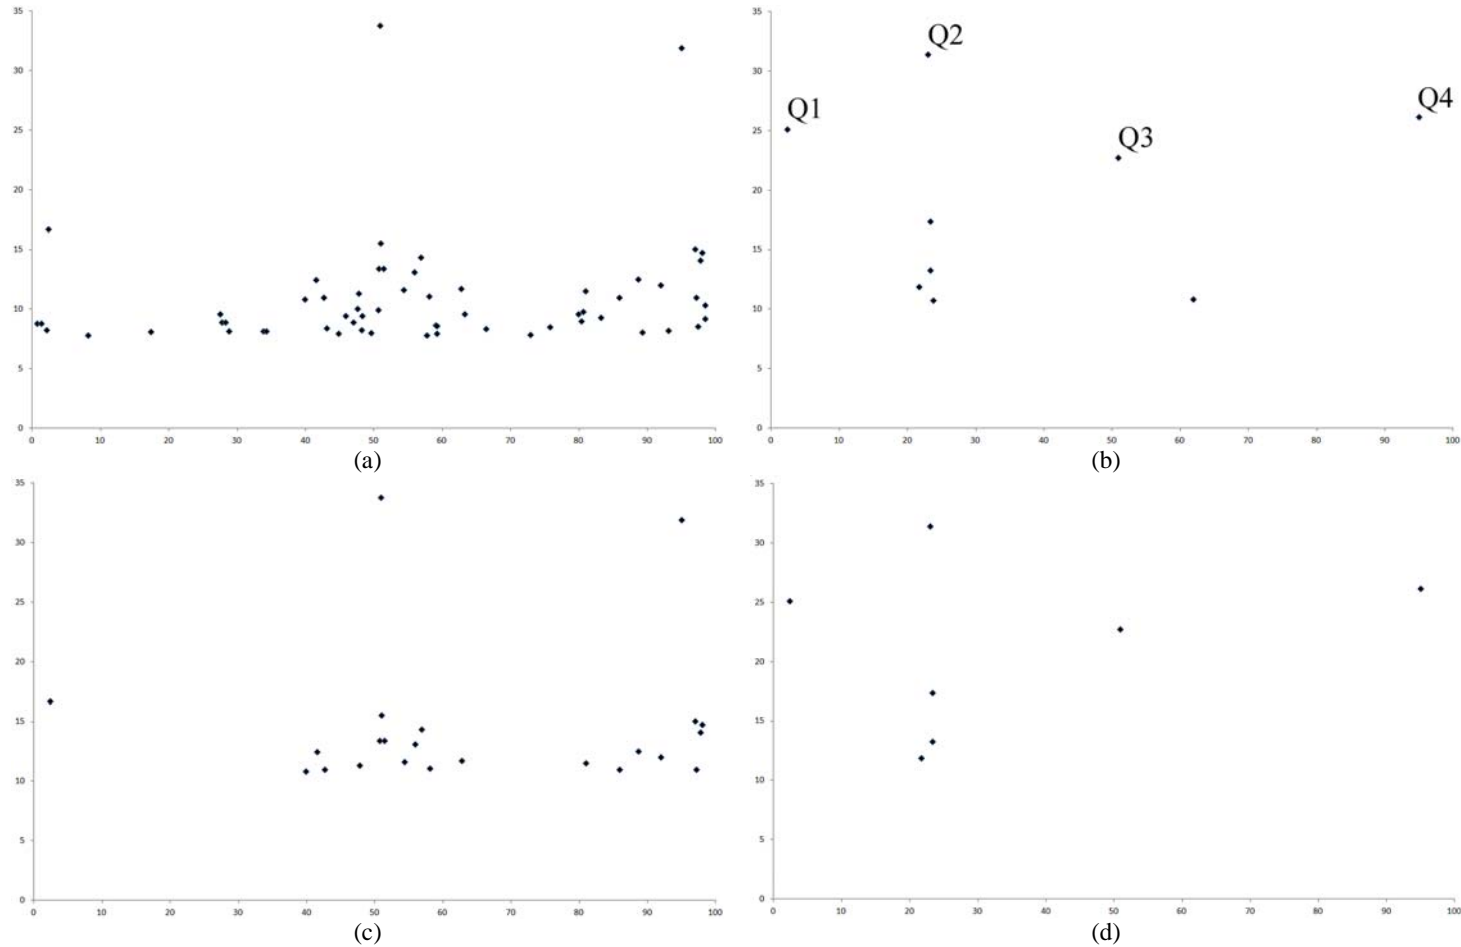

550 **Figure 1** Significant associations at a FDR of 5 (a and b) or 1% (c and d) (F test; Y axe) in chromosome 1 (SNP position (cM); X axe), from the  
 551 GWAS in population 1, generations 0 (a and c) and 10r (random cross) (b and d), regarding expansion volume, QTL heritability of 8%, and sample  
 552 size 400 (simulation 1) (Q = QTL).

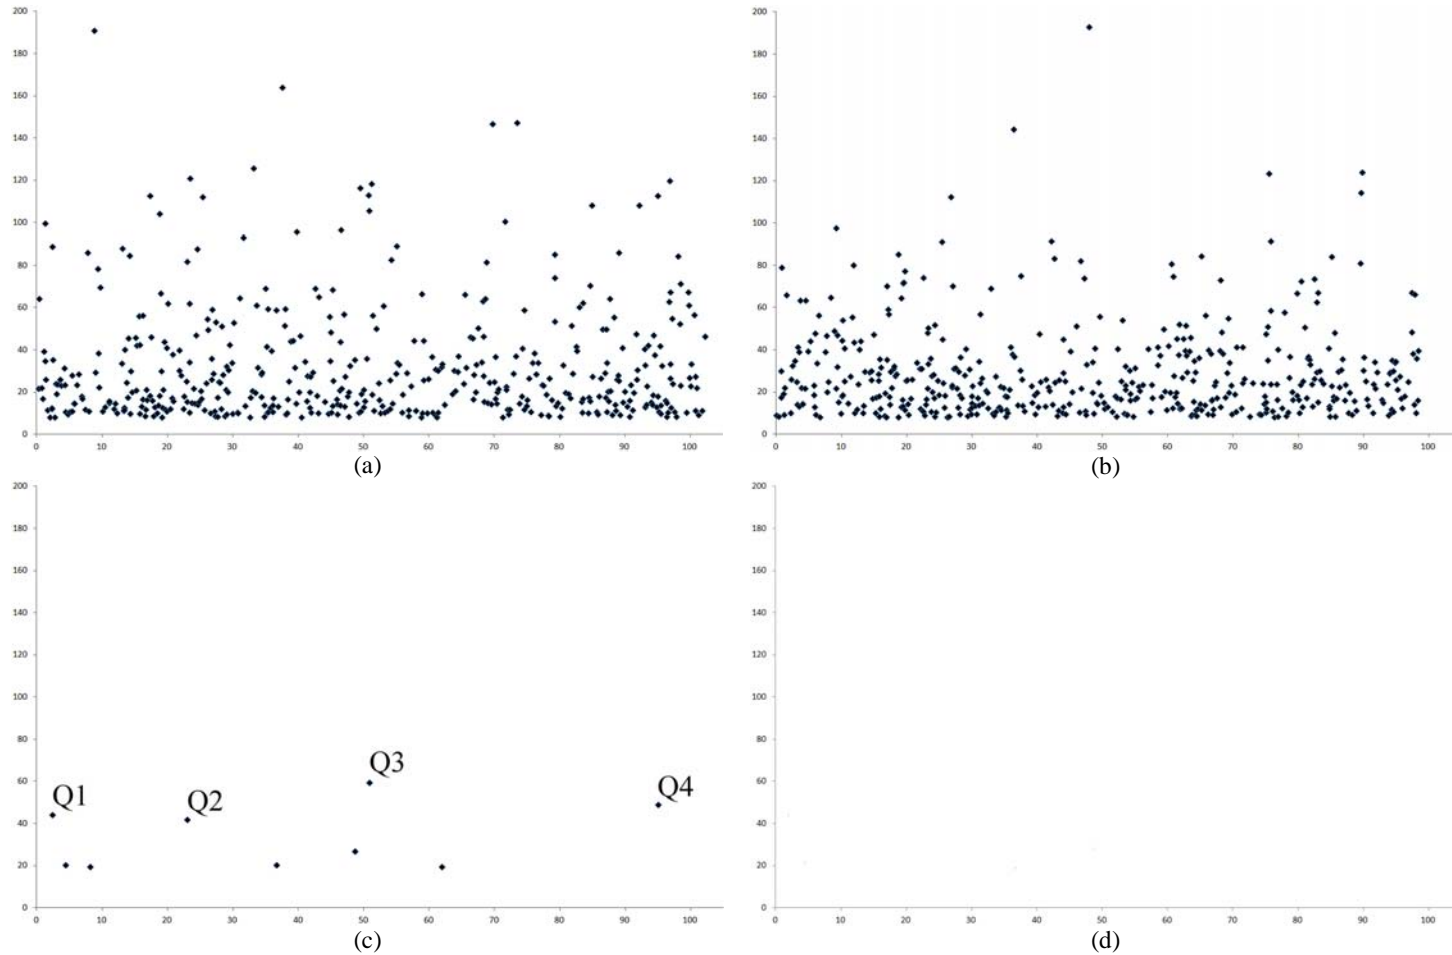

553 **Figure 2** Significant associations at a FDR of 1% (F test; Y axe) in chromosomes 1 and 3 (SNP position (cM); X axe) ignoring (a and b, respectively)  
 554 and correcting for the population structure (c and d, respectively), from the GWAS in an inbred lines panel regarding expansion volume, QTL  
 555 heritability of 8%, and sample size 400 (simulation 1) (Q = QTL).

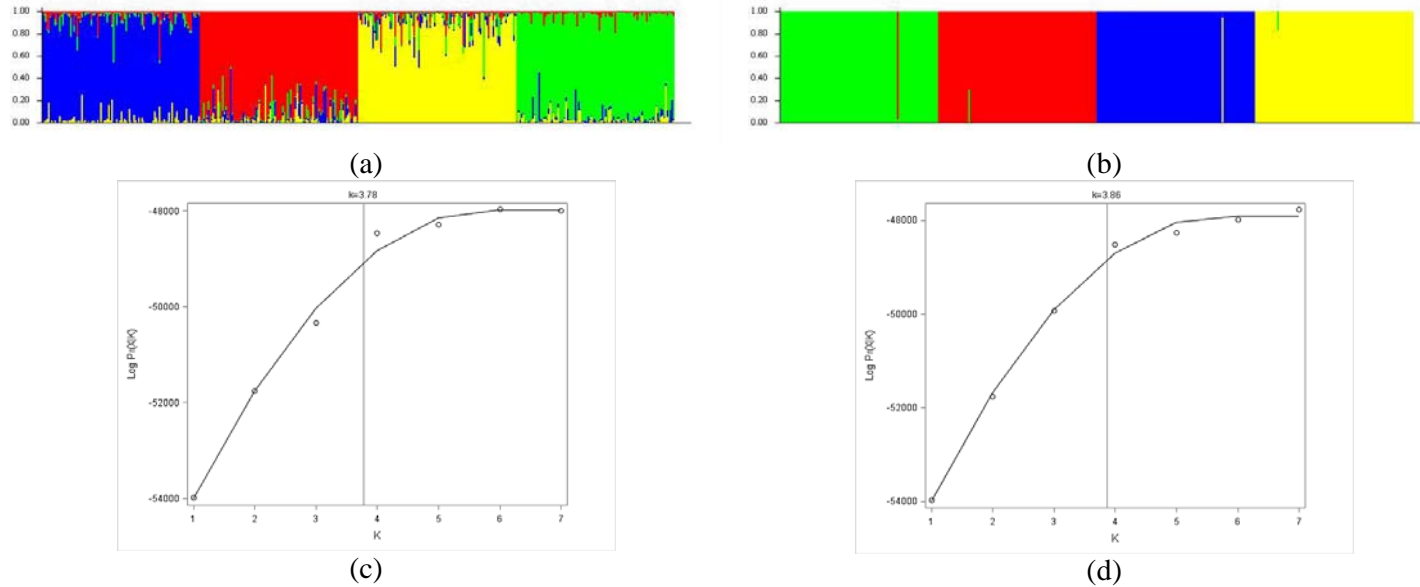

556 **Figure 3** Results from the population structure analysis and the inferred plateau method, based on the admixture model with correlated allelic  
557 frequencies (a and c) and the no admixture model with independent allelic frequencies (b and d).

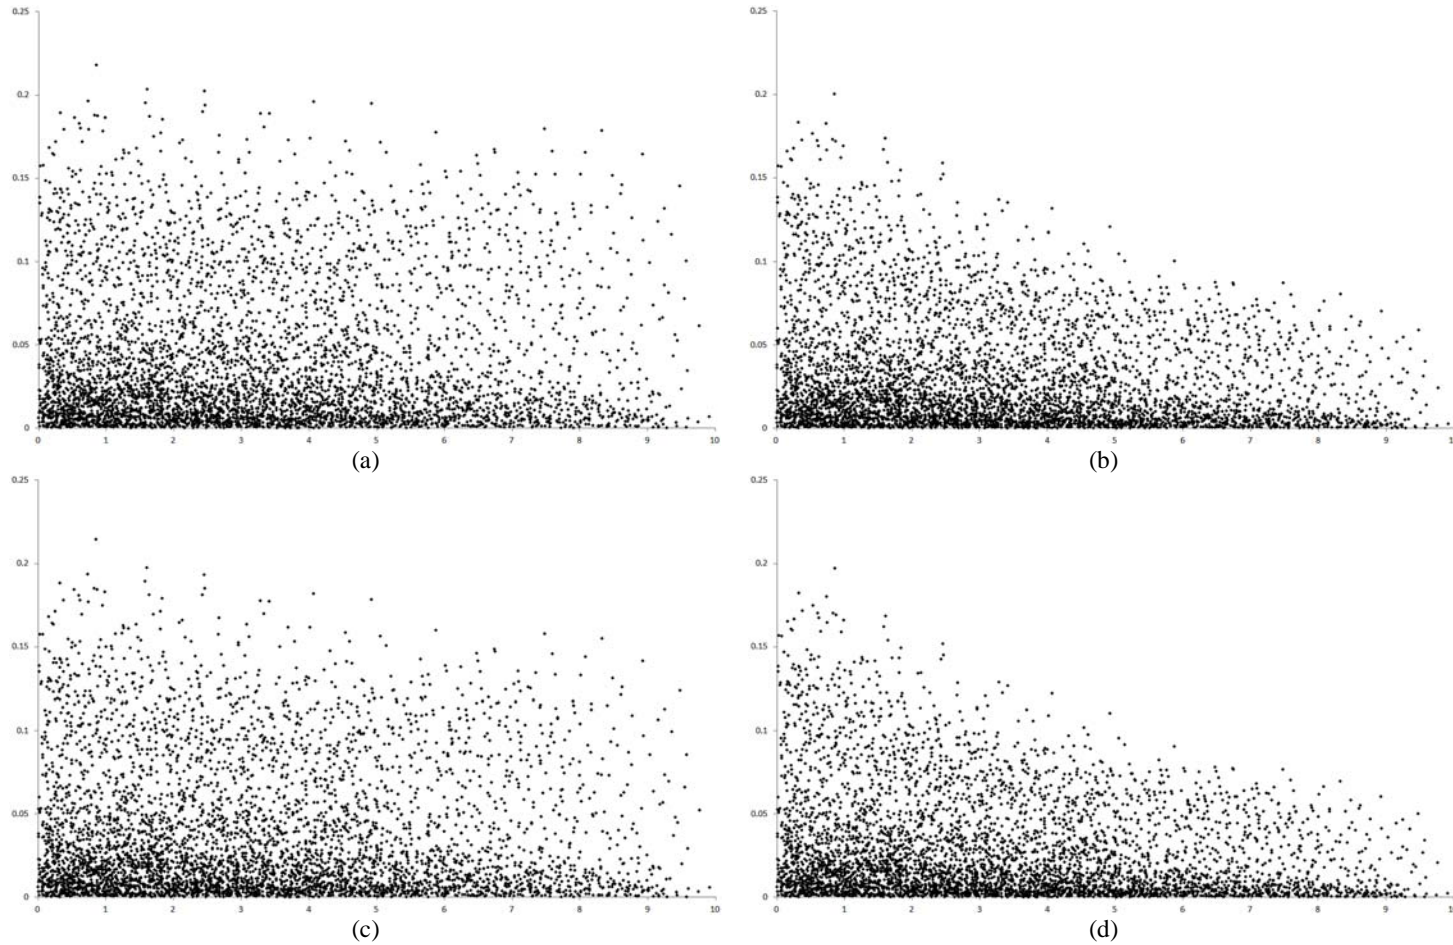

558 **Figure 4** Relationship between the parametric LD value (absolute value; Y axe) and distance (cM; X axe) in population 1, generations 0 (a), 10r  
 559 (random cross) (b), 10s (selfing) (c), and 10r10s (d), assuming a segment of 10 cM of chromosome 1 (centered on QTL 3).

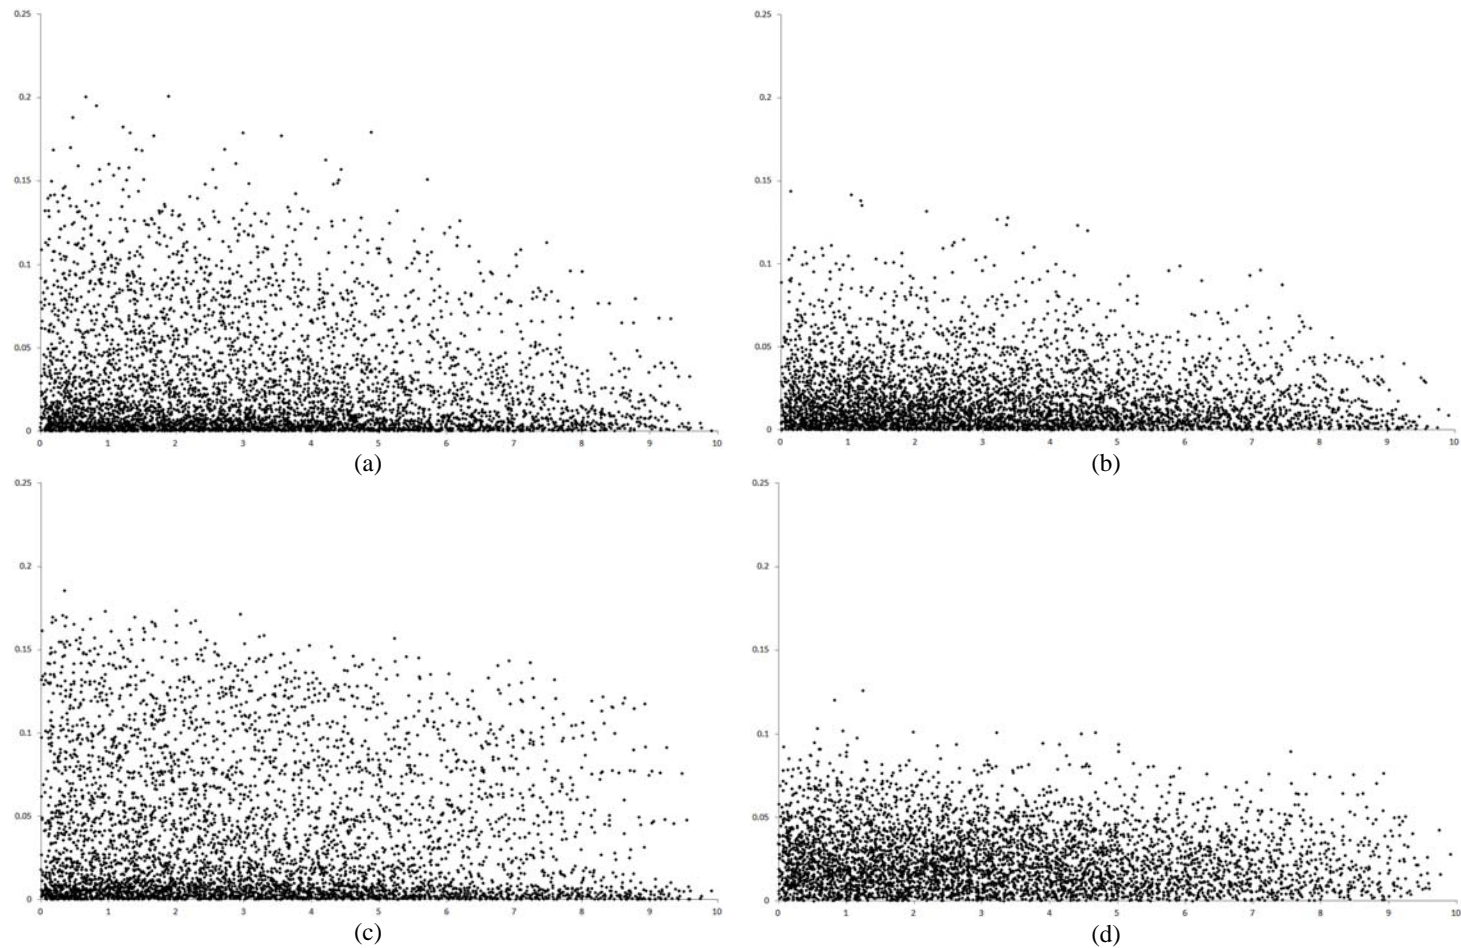

560 **Figure 5** Relationship between the parametric LD value (absolute value; Y axis) and distance (cM; X axis) in populations 2 (a), 3 (b), and 4 (c),  
561 generation 10s (selfing), and in the inbred lines panel (d), assuming a segment of 10 cM of chromosome 1 (centered on QTL 3).

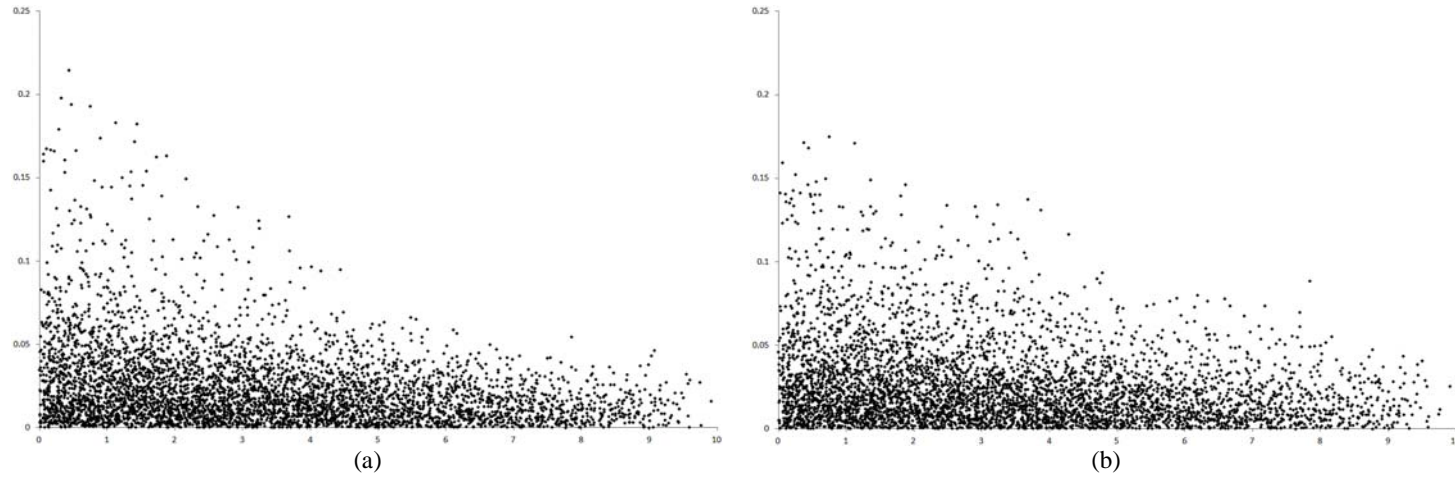

562 **Figure 6** Relationship between the estimated LD value (absolute value; Y axe) and distance (cM; X axe) in population 1, generations 10r (random  
563 cross) (a) and 10r10s (random cross and selfing) (b), simulation 1, assuming a segment of 10 cM of chromosome 1 (centered on QTL 3).
